# Supplementary material
Source: HighWire-hosted journal article supplement (https://www.jrheum.org/highwire/filestream/35853/field_highwire_adjunct_files/0/181087DataSuppl.pdf)
Supplement: 181087DataSuppl.pdf [file 181087DataSuppl.pdf]

## ONLINE SUPPLEMENTARY DATA

Supplementary Table 1 Frequency of ultrasound pathology

| Author                            | Year | Clinical arthritis /<br>arthralgia (%) | Synovitis (%)                                       | SH (%)                                            | PD (%)                                    | Joint<br>effusion (%) | Bone erosion (%)                                                                                                   | Tenosynovitis (%) | Enthesitis (%)    |
|-----------------------------------|------|----------------------------------------|-----------------------------------------------------|---------------------------------------------------|-------------------------------------------|-----------------------|--------------------------------------------------------------------------------------------------------------------|-------------------|-------------------|
| Dreyer et al. <sup>1</sup>        | 2015 | 48 (at time of US)                     | 48 (wrist)<br>36 (MCP)                              | 42 (wrist)<br>33 (MCP)                            | 33 (wrist, CD)<br>21 (MCP, CD)            | -                     | 6                                                                                                                  | 18                | -                 |
| Mosca et al. <sup>2</sup>         | 2015 | 94.1 (ever)<br>24.5 (at time of US)    | 42.2                                                | 9.8 (wrist)<br>15.7 (hand)<br>16.7 (wrist + hand) | 10.7                                      | 17                    | 31.4                                                                                                               | 38.2              | -                 |
| Mukherjee et al. <sup>3</sup>     | 2016 | -                                      | - <sup>a</sup>                                      | 60 (MCP)<br>80 (MTP)<br>100 (bursa)               | 30 (MCP)<br>10 (MTP)<br>10 (bursa)        | -                     | - <sup>a</sup>                                                                                                     | -                 | -                 |
| Piga et al. <sup>4</sup>          | 2016 | -                                      | -                                                   | -                                                 | -                                         | -                     | 13.5 (MC head 2)<br>3.8 (MC head 3)<br>0.9 (MC head 4)<br>3.8 (MC head 5)<br>5.8 (radiocarpal)<br>4.8 (ulnar head) | -                 | -                 |
| Piga et al. <sup>5</sup>          | 2016 | 11.2 (baseline)                        | - <sup>a</sup>                                      | 18.8 (baseline)                                   | 12.6 (baseline)                           | -                     | 16.2 (baseline)                                                                                                    | 37.5 (baseline)   | -                 |
| Ceccarelli et al. <sup>6</sup>    | 2017 | 100                                    | 29.4                                                | 76.5                                              | 29.4                                      | 88.2                  | 58.8                                                                                                               | -                 | -                 |
| Lins et al. <sup>7</sup>          | 2017 | 15.2 <sup>b</sup>                      | 2.8 <sup>b</sup>                                    | -                                                 | -                                         | -                     | -                                                                                                                  | 4.7 <sup>c</sup>  | -                 |
| Ogura et al. <sup>8</sup>         | 2017 | 100                                    | 80                                                  | -                                                 | -                                         | -                     | -                                                                                                                  | 93                | -                 |
| Ruano et al. <sup>9</sup>         | 2017 | 17                                     | 36.7 (asymptomatic)<br>83.3 (symptomatic)           | 76.7 (asymptomatic)<br>100 (symptomatic)          | 23.3 (asymptomatic)<br>83.3 (symptomatic) | -                     | -                                                                                                                  | -                 | -                 |
| Salliot et al. <sup>10</sup>      | 2018 | 59                                     | 40.4                                                | 72.2                                              | 44                                        | 71.5                  | 15.2                                                                                                               | 10                | -                 |
| Di Matteo et al. <sup>11</sup>    | 2018 | 100                                    | 35 <sup>b</sup>                                     | 21 <sup>b</sup>                                   | 30.9 <sup>b</sup>                         | 9.5 <sup>b</sup>      | 2.1 <sup>b</sup>                                                                                                   | 17.7 <sup>c</sup> | 24.4 <sup>d</sup> |
| Di Matteo et al. <sup>12</sup>    | 2018 | 76.9                                   | -                                                   | -                                                 | -                                         | -                     | -                                                                                                                  | -                 | 67.7              |
| Lins et al. <sup>13</sup>         | 2018 | 100                                    | 14.1 (wrist)<br>1.8 (MCP)<br>0 (PIP)<br>2.8 (total) | 47.5                                              | -                                         | -                     | 5                                                                                                                  | 22.5              | -                 |
| Gunasherkar et al. <sup>14</sup>  | 2018 | 75                                     | -                                                   | 22 (wrist)<br>13 (MCP)                            | -                                         | -                     | -                                                                                                                  | 11                | -                 |
| Abdel-Magied et al. <sup>15</sup> | 2018 | 100                                    | 66.7                                                | 66.7                                              | 33.3                                      | -                     | 23.3                                                                                                               | 56.7              | -                 |

US, ultrasound; MCP, metacarpophalangeal; PIP, proximal interphalangeal; GS, greyscale, PD, power Doppler; CD, colour Doppler;

MTP, metatarsophalangeal; MC, metacarpal.

- a: This parameter was studied but was not reported
- b: This percentage was relative to the total number of joints scanned
- c: This percentage was relative to the total number of tendons scanned
- d: This percentage was relative to the total number of entheses scanned

Supplementary Table 2 Characteristics of ultrasound scanning techniques and settings

| Author                            | Year | Bilateral or unilateral examination | US scanning techniques | US mode | US setting | US machine                                   | US transducer | US transducer frequency (MHz) |
|-----------------------------------|------|-------------------------------------|------------------------|---------|------------|----------------------------------------------|---------------|-------------------------------|
| Dreyer et al. <sup>1</sup>        | 2015 | Unilateral (by lot)                 | Yes                    | GS, CD  | Yes        | GE, Logiq 9                                  | Linear        | 9-14                          |
| Mosca et al. <sup>2</sup>         | 2015 | Unilateral (non-dominant hand)      | No                     | GS, PD  | -          | GE, Logiq 9                                  | Linear        | 14                            |
| Mukherjee et al. <sup>3</sup>     | 2016 | Bilateral                           | Yes                    | GS, PD  | -          | Esaote, MyLab70                              | Linear        | 8-16                          |
| Piga et al. <sup>4</sup>          | 2016 | Bilateral                           | Yes                    | -       | -          | GE, Logiq 9                                  | Volumetric    | 8-15                          |
| Piga et al. <sup>5</sup>          | 2016 | Bilateral                           | -                      | GS, PD  | -          | GE, Logiq 9                                  | Linear        | 8-15                          |
| Ceccarelli et al. <sup>6</sup>    | 2017 | Bilateral                           | -                      | GS, PD  | Yes        | Esaote, MyLab70 X-Vision Gold                | Linear        | 6-18                          |
| Lins et al. <sup>7</sup>          | 2017 | Bilateral                           | Yes                    | GS      | -          | HD11 XE US System                            | -             | 10-14                         |
| Ogura et al. <sup>8</sup>         | 2017 | Bilateral                           | Yes                    | GS, PD  | Yes        | Toshiba, Xario                               | Linear        | 7-14                          |
| Ruano et al. <sup>9</sup>         | 2017 | Bilateral                           | Yes                    | GS, PD  | Yes        | GE, Logiq E9                                 | Linear        | 6-15                          |
| Salliot et al. <sup>10</sup>      | 2018 | Bilateral                           | -                      | GS, PD  | -          | -                                            | -             | 10-13                         |
| Di Matteo et al. <sup>11</sup>    | 2018 | Bilateral                           | Yes                    | GS, PD  | Yes        | Esaote, MyLab Twice                          | Linear        | 3-14, 6-18, 10-22             |
| Di Matteo et al. <sup>12</sup>    | 2018 | Bilateral                           | Yes                    | GS, PD  | Yes        | Esaote, MyLab Twice<br>Esaote, MyLab Class C | Linear        | 6-18                          |
| Lins et al. <sup>13</sup>         | 2018 | Bilateral                           | Yes                    | GS      | -          | Esaote, MyLab 25Gold                         | -             | 14                            |
| Gunashekar et al. <sup>14</sup>   | 2018 | Unilateral (non-dominant hand)      | No                     | GS      | -          | Phillips IU22                                | Linear        | 7-12                          |
| Abdel-Magied et al. <sup>15</sup> | 2018 | Bilateral                           | No                     | GS, PD  | -          | Siemens, ACUSON X700                         | Linear        | 10-18                         |

US, ultrasound; GS, greyscale; CD, colour Doppler; PD, power Doppler.

Supplementary Table 3 Association between clinical, laboratory and other imaging assessments with ultrasound findings

| Author                          | Year | SLE disease activity / damage index | Clinical assessment                                                                                                                                                                      | Laboratory assessment                                                                               | Imaging (X-ray, CT, MRI) | Association between US and clinical assessment                | Association between US and laboratory assessment | Association between US and other image modality |
|---------------------------------|------|-------------------------------------|------------------------------------------------------------------------------------------------------------------------------------------------------------------------------------------|-----------------------------------------------------------------------------------------------------|--------------------------|---------------------------------------------------------------|--------------------------------------------------|-------------------------------------------------|
| Dreyer et al. <sup>1</sup>      | 2015 | SLEDAI, SLICC                       | TJC, SJC, VAS Pain, VAS fatigue, VAS patient's global, VAS physician's global, HAQ, subtypes of SLE arthropathy                                                                          | ANA, anti-dsDNA                                                                                     | -                        | Yes                                                           | No                                               | -                                               |
| Mosca et al. <sup>2</sup>       | 2015 | SLEDAI-2K, SLICC/ACR, ECLAM         | 44-joint count, subtypes of SLE arthropathy, JAI                                                                                                                                         | CRP, ANA, anti-dsDNA, anti-ENA, LAC, aCL, anti-b2GPI, RF, anti-CCP                                  | MRI                      | No                                                            | Yes (CRP only)                                   | -                                               |
| Mukherjee et al. <sup>3</sup>   | 2016 | SELENA-SLEDAI                       | Foot Impact Scale (FIS <sub>IF</sub> and FIS <sub>AP</sub> )                                                                                                                             | RF                                                                                                  | -                        | No                                                            | No                                               | -                                               |
| Piga et al. <sup>4</sup>        | 2016 | SLICC                               | Subtypes of SLE arthropathy                                                                                                                                                              | ANA, anti-dsDNA, anti-Ro/SSA, anti-La/SSB, anti-RNP, anti-Sm, aPL Ab, RF, anti-CCP                  | CT                       | Yes                                                           | No                                               | Yes                                             |
| Piga et al. <sup>5</sup>        | 2016 | SLEDAI, SLICC, SDI, BILAG           | TJC, SJC, Fixed or reducible MCP subluxation, ulnar drift, swan neck, boutonniere deformities of fingers, Z thumb, tenderness and swelling of flexors and extensors tendons, JAI, SF36v2 | CRP, C3, C4, ANA, anti-dsDNA, anti-Ro/SSA, anti-La/SSB, anti-RNP, anti-Sm, RF, anti-CCP             | X-ray                    | Yes                                                           | Yes (CRP only)                                   | -                                               |
| Ceccarelli et al. <sup>6</sup>  | 2017 | SLEDAI-2K, SDI                      | TJC, SJC, VAS patient's global, VAS physician's, global, DAS28, HAQ-DI                                                                                                                   | ESR, CRP, C3, C4, ANA, anti-dsDNA, anti-Ro/SSA, anti-La/SSB, anti-RNP, anti-Sm, LA, aCL, anti-b2GPI | -                        | -                                                             | -                                                | -                                               |
| Lins et al. <sup>7</sup>        | 2017 | -                                   | TJC, SJC                                                                                                                                                                                 | -                                                                                                   | -                        | Yes (tenosynovitis)                                           | -                                                | -                                               |
| Ogura et al. <sup>8</sup>       | 2017 | SLEDAI                              | TJC, SJC, DAS28-CRP                                                                                                                                                                      | ESR, CRP, C3, C4, ANA, anti-dsDNA, anti-Sm, RF, anti-CCP                                            | X-ray                    | No                                                            | No                                               | -                                               |
| Ruano et al. <sup>9</sup>       | 2017 | SLEDAI-2K, SLICC                    | Subtypes of SLE arthropathy                                                                                                                                                              | ESR, C3, C4, ANA, anti-dsDNA, RF, anti-CCP                                                          | -                        | Yes                                                           | No                                               | -                                               |
| Salliot et al. <sup>10</sup>    | 2018 | SLEDAI                              | TJC, SJC, VAS joint pain, subtypes of SLE arthropathy                                                                                                                                    | ESR, CRP, ANA, anti-dsDNA, RF, anti-CCP                                                             | X-ray                    | No                                                            | No                                               | -                                               |
| Di Matteo et al. <sup>11</sup>  | 2018 | SLEDAI-2K                           | Subtypes of SLE arthropathy, JAI                                                                                                                                                         | ESR, CRP, ANA, anti-dsDNA, anti-Ro/SSA, anti-La/SSB, anti-Sm, anti-U1RNP, aPL Ab, RF, anti-CCP      | -                        | -                                                             | -                                                | -                                               |
| Di Matteo et al. <sup>12</sup>  | 2018 | SLEDAI-2K, m-BILAG 2004             | Subtypes of SLE arthropathy, swelling and tenderness of lower limb entheses                                                                                                              | ESR, CRP, C3, C4, ANA, anti-dsDNA, anti-Ro/SSA, anti-La/SSB, anti-RNP, anti-Sm                      | -                        | Yes (active enthesitis)<br>No (structural damage of entheses) | Yes (CRP only)                                   | -                                               |
| Lins et al. <sup>13</sup>       | 2018 | SLEDAI                              | Swan neck deformity, ulnar deviation, Z thumb, hallux valgus                                                                                                                             | ANA, anti-dsDNA, anti-Ro/SSA, anti-La/SSB, anti-RNP, anti-Sm, aCL IgG, aCL IgM                      | -                        | -                                                             | -                                                | -                                               |
| Gunashekar et al. <sup>14</sup> | 2018 | -                                   | TJC, SJC, IHAQ                                                                                                                                                                           | ESR, ANA, RF, anti-U1RNP                                                                            | X-ray                    | -                                                             | -                                                | -                                               |

|                                  |      |           |                            |                                                                                                 |   |     |                |   |
|----------------------------------|------|-----------|----------------------------|-------------------------------------------------------------------------------------------------|---|-----|----------------|---|
| Abdel-Magied et al <sup>15</sup> | 2018 | SLEDAI-2K | TJC, SJC, VAS Pain, HAQ-DI | ESR, CRP, C3, C4, ANA, anti-dsDNA, RF, anti-CCP, urine for albumin, casts, red blood cells, pus | - | Yes | Yes (CRP only) | - |
|----------------------------------|------|-----------|----------------------------|-------------------------------------------------------------------------------------------------|---|-----|----------------|---|

SLEDAI-2K, Systemic Lupus Erythematosus Disease Activity Index 2000; SLICC/ACR, Systemic Lupus International Collaborating Clinics/American College of Rheumatology; ECLAM, European Consensus Lupus Activity Measure; SELENA-SLEDAI, The Safety of Estrogens in Lupus Erythematosus National Assessment – Systemic Lupus Erythematosus Disease Activity Index; SDI, Systemic Lupus International Collaborating Clinics/American College of Rheumatology Damage Index; m-BILAG, musculoskeletal-British Isles Lupus Assessment Group Scale; TJC, tender joint count; SJC, swollen joint count, VAS, visual analogue scale; HAQ, Health assessment questionnaire; FIS<sub>IF</sub>, Foot Impact Scale foot ‘foot impairment’; FIS<sub>AP</sub>, Foot Impact Scale ‘activity limitation and participation restriction’; MCP, metacarpophalangeal; JAI, Jaccoud’s arthropathy index, SF36v2, Short Form 36 version 2; DAS28, disease activity score 28; HAQ-DI, Health assessment questionnaire disability index; IHAQ, Indian health assessment questionnaire; ANA, anti-nuclear antibody; anti-dsDNA, anti-double stranded deoxyribonucleic acid; CRP, C-reactive protein; anti-ENA, anti-extractable nuclear antigen; LAC, lupus anticoagulant; aCL, anti-cardiolipin; anti-β2GP1, anti-beta 2 glycoprotein 1; RF, rheumatoid factor; anti-CCP, anti-cyclic citrullinated peptide antibodies; anti-RNP, anti-ribonucleoprotein; anti-Sm, anti-Smith; aPL Ab, anti-phospholipid antibody; C3, complement 3; C4, complement 4; ESR, erythrocyte sedimentation rate; anti-SSA, anti-Sjögren’s-syndrome-related antigen A; anti-SSB, anti-Sjögren’s-syndrome-related antigen B; IgG, immunoglobulin G; IgM, immunoglobulin M; MRI, magnetic resonance imaging; CT, computer tomography.

Supplementary Table 4 Signaling questions for quality assessment of included studies

| <b>Risk of bias</b>           |                                                                                                                                                                                                                                                                                                                                        |
|-------------------------------|----------------------------------------------------------------------------------------------------------------------------------------------------------------------------------------------------------------------------------------------------------------------------------------------------------------------------------------|
| Patient selection             | Was a consecutive or random sample of SLE patients enrolled?<br>Was a case-control design avoided?<br>Were rhus patients separated or excluded in the final analysis?                                                                                                                                                                  |
| Index test                    | Was the sonographer blinded to the clinical and laboratory data of the patients?<br>Was the US scoring method pre-specified?                                                                                                                                                                                                           |
| Reference standard            | Was there an imaging used as a reference standard (the best available method to establish the presence or absence of the target condition)?<br>Was the reference standard used in the study likely to correctly classify the target condition?<br>Was the reference standard results interpreted without knowledge of the US findings? |
| Flow and timing               | Was US done at the same time as the clinical reference standard test?<br>Did all patients receive the same reference standard?<br>Were all patients included in the analysis?                                                                                                                                                          |
| <b>Applicability concerns</b> |                                                                                                                                                                                                                                                                                                                                        |
| Patient selection             | Are there concerns that the included patients do not match the review question?                                                                                                                                                                                                                                                        |
| Index test                    | Are there concerns that US was conducted or interpreted differently from the review question?                                                                                                                                                                                                                                          |
| Reference standard            | Are there concerns that the target condition as defined by the reference standard used in the study did not meet the questions?                                                                                                                                                                                                        |

Supplementary Table 5 Quality assessment of included studies

| <b>Author</b>                     | <b>Risk of bias</b>      |                   |                           |                        | <b>Applicability concerns</b> |                   |                           |
|-----------------------------------|--------------------------|-------------------|---------------------------|------------------------|-------------------------------|-------------------|---------------------------|
|                                   | <b>Patient selection</b> | <b>Index test</b> | <b>Reference standard</b> | <b>Flow and timing</b> | <b>Patient selection</b>      | <b>Index test</b> | <b>Reference standard</b> |
| Dreyer et al. <sup>1</sup>        | High                     | Low               | High                      | Low                    | Low                           | Low               | High                      |
| Mosca et al. <sup>2</sup>         | High                     | Low               | Low                       | Low                    | Low                           | Low               | Low                       |
| Mukherjee et al. <sup>3</sup>     | Low                      | Unclear           | High                      | Low                    | Low                           | Low               | High                      |
| Piga et al. <sup>4</sup>          | High                     | Unclear           | Low                       | Low                    | Low                           | Low               | Low                       |
| Piga et al. <sup>5</sup>          | High                     | Low               | High                      | Low                    | Low                           | Low               | High                      |
| Ceccarelli et al. <sup>6</sup>    | Low                      | Low               | High                      | Unclear                | Low                           | Low               | High                      |
| Lins et al. <sup>7</sup>          | High                     | Unclear           | High                      | Unclear                | Low                           | Low               | High                      |
| Ogura et al. <sup>8</sup>         | High                     | High              | High                      | Low                    | Low                           | Low               | High                      |
| Ruano et al. <sup>9</sup>         | High                     | Low               | High                      | Low                    | Low                           | Low               | High                      |
| Salliot et al. <sup>10</sup>      | High                     | Low               | High                      | Low                    | Low                           | Low               | High                      |
| Di Matteo et al. <sup>11</sup>    | High                     | Low               | High                      | Low                    | Low                           | Low               | High                      |
| Di Matteo et al. <sup>12</sup>    | High                     | Low               | High                      | Low                    | Low                           | Low               | High                      |
| Lins et al. <sup>13</sup>         | Low                      | Low               | High                      | Low                    | Low                           | Low               | High                      |
| Gunashekar et al. <sup>14</sup>   | High                     | Unclear           | High                      | Unclear                | Low                           | High              | High                      |
| Abdel-Magied et al. <sup>15</sup> | High                     | Unclear           | High                      | Unclear                | Low                           | High              | High                      |

## REFERENCES

1. Dreyer L, Jacobsen S, Juul L, Terslev L. Ultrasonographic abnormalities and inter-reader reliability in danish patients with systemic lupus erythematosus - a comparison with clinical examination of wrist and metacarpophalangeal joints. *Lupus* 2015;24:712-9.
2. Mosca M, Tani C, Carli L, Vagnani S, Possemato N, Delle Sedie A, et al. The role of imaging in the evaluation of joint involvement in 102 consecutive patients with systemic lupus erythematosus. *Autoimmun Rev* 2015;14:10-5.
3. Mukherjee S, Cherry L, Zarroug J, Culliford D, Bowen C, Arden N, et al. A pilot investigation of the prevalence of us-detectable forefoot joint pathology and reported foot-related disability in participants with systemic lupus erythematosus. *J Foot Ankle Res* 2016;9:27.
4. Piga M, Saba L, Gabba A, Congia M, Balestrieri A, Mathieu A, et al. Ultrasonographic assessment of bone erosions in the different subtypes of systemic lupus erythematosus arthritis: Comparison with computed tomography. *Arthritis Res Ther* 2016;18:222.
5. Piga M, Gabba A, Congia M, Figus F, Cauli A, Mathieu A. Predictors of musculoskeletal flares and jaccouds arthropathy in patients with systemic lupus erythematosus: A 5-year prospective study. *Semin Arthritis Rheum* 2016;46:217-24.
6. Ceccarelli F, Massaro L, Perricone C, Pendolino M, Cipriano E, Truglia S, et al. Jaccoud's arthropathy in systemic lupus erythematosus: Clinical, laboratory and ultrasonographic features. *Clin Exp Rheumatol* 2017;35:674-7.
7. Lins CF, Lima de Sa Ribeiro D, Dourado Santos WG, Rosa G, Machicado V, Pedreira AL, et al. Ultrasound findings on hands and wrists of patients with systemic lupus erythematosus: Relationship with physical examination. *Ultrasound Med Biol* 2017;43:1764-8.
8. Ogura T, Hirata A, Hayashi N, Takenaka S, Ito H, Mizushina K, et al. Comparison of ultrasonographic joint and tendon findings in hands between early, treatment-naive patients with systemic lupus erythematosus and rheumatoid arthritis. *Lupus* 2017;26:707-14.
9. Ruano CA, Malheiro R, Oliveira JF, Pinheiro S, Vieira LS, Moraes-Fontes MF. Ultrasound detects subclinical joint inflammation in the hands and wrists of patients with systemic lupus erythematosus without musculoskeletal symptoms. *Lupus Sci Med* 2017;4:e000184.



Online supplement to: Musculoskeletal Ultrasound in Systemic Lupus Erythematosus: Systematic Literature Review by the Lupus Task Force of the OMERACT Ultrasound Working Group. *The Journal of Rheumatology*. doi:10.3899/jrheum.181087

10.Salliot C, Denis A, Dernis E, Andre V, Perdriger A, Albert JD, et al. Ultrasonography and detection of subclinical joints and tendons involvements in systemic lupus erythematosus (sle) patients: A cross-sectional multicenter study. *Joint Bone Spine* 2018;85:741-5.

11.Di Matteo A, De Angelis R, Cipolletta E, Filippucci E, Grassi W. Systemic lupus erythematosus arthropathy: The sonographic perspective. *Lupus* 2018;27:794-801.

12.Di Matteo A, Filippucci E, Cipolletta E, Satulu I, Hurnakova J, Lato V, et al. Enthesal involvement in patients with systemic lupus erythematosus: An ultrasound study. *Rheumatology (Oxford)* 2018;57:1822-9.

13.Lins CF, de Sa Ribeiro DL, Santos WGD, Rosa G, Machicado V, Pedreira AL, et al. Sonographic findings of hands and wrists in systemic lupus erythematosus patients with jaccoud arthropathy. *J Clin Rheumatol* 2018;24:70-4.

14.Gunashekar S, Prakash M, Minz RW, Sharma A, Sharma S, Dhir V. Comparison of articular manifestations of mixed connective tissue disease and systemic lupus erythematosus on clinical examination and musculoskeletal ultrasound. *Lupus* 2018;27:2086-92.

15.Abdel-Magied RA AH, Ali LH, Talaat H, Mohamed FI. Diagnostic potential of ultrasound in systemic lupus erythematosus patients with joint involvement: Relation to anticyclic citrullinated peptide (anti-ccp), disease activity and functional status. *The Egyptian Rheumatologist*  
<https://doi.org/10.1016/j.ejr.2018.11.004>.
